# Supplementary material for: Inter-annual and spatial variability in hillslope runoff and mercury flux during spring snowmelt
Source: Royal Society of Chemistry journal article supplement (doi:10.1039/c2em30267e), 2012-01-01
Supplement: c2em30267e.pdf [file c2em30267e.pdf]

1 **Supplementary Figure 1:** Relationship between filtered THg and DOC runoff concentrations during 2010  
2 and 2011 melt periods.

3

4 **Supplementary Figure 2:** Depth profile of soil THg concentrations and organic matter content  
5 (represented as % loss on ignition (LOI)). THg concentrations and %LOI at each depth (excluding surface  
6 silt) represent an average of nine soil cores collected in each of the S7A, S7B and S7C plots from the  
7 hillslope ridge, midslope and toeslope regions (surface silt is average of three cores, one core collected  
8 the midslope region of each plot).

9 Supplementary Figure 1

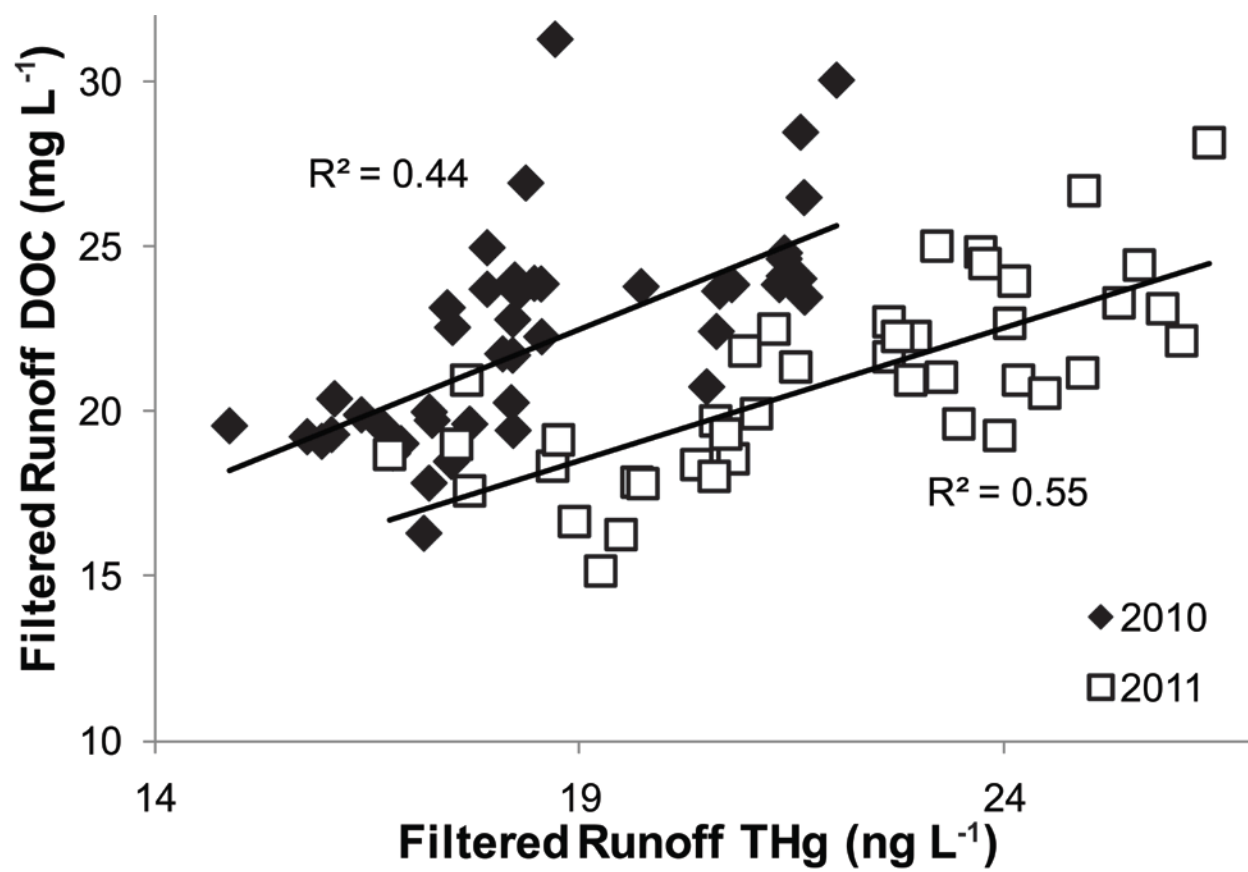

10

11

12 **Supplementary Figure 2**

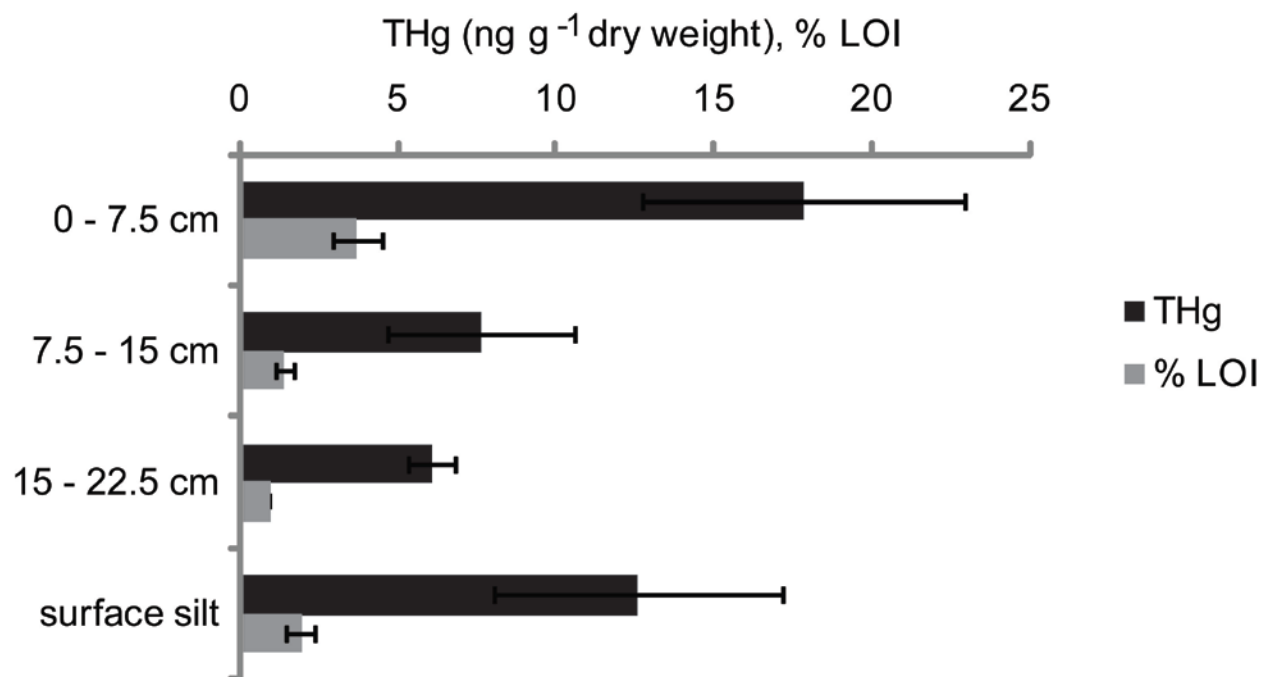

13

14

15

16

17

18

19

20

21
